# Supplementary material for: Experiences and Beliefs of Low‐Income Patients With Hypertension in Louisiana and Mississippi During the COVID‐19 Pandemic
Source: PubMed Central journal article supplement — J Am Heart Assoc. 2021 Jan 29;10(3):e018510. doi: 10.1161/JAHA.120.018510 (PMC7955429; doi:10.1161/jaha.120.018510), 2021-01-29
Supplement: JAH3-10-e018510-s001.pdf [file JAH3-10-e018510-s001.pdf]

# **Supplementary Materials**

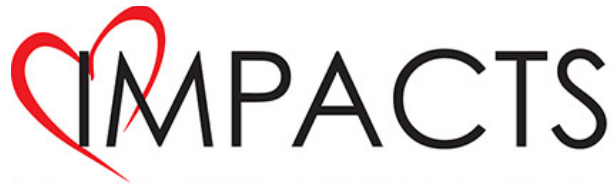

Implementation of Multifaceted Patient-Centered Treatment  
Strategies for Intensive Blood Pressure Control

**Data S1. IMPACTS COVID-19 Questionnaire**

**PID**  **INITIALS**  **DATE**  /  /   
mm dd yyyy

**RCID**

“Today, I’d like to ask you some questions about your experiences with COVID-19 and how it has impacted your life and your health. The questions should take about 20 minutes.”

**“Since the COVID-19 outbreak, have you experienced any of the following life events?”**

|    |                                                                      | Yes                      | No                       |
|----|----------------------------------------------------------------------|--------------------------|--------------------------|
| 1. | Testing positive for COVID-19?                                       | <input type="checkbox"/> | <input type="checkbox"/> |
| 2. | Being exposed to someone with COVID-19?                              | <input type="checkbox"/> | <input type="checkbox"/> |
| 3. | Family member or close friend with COVID-19?                         | <input type="checkbox"/> | <input type="checkbox"/> |
| 4. | Loss of a family member or close friend due to COVID-19?             | <input type="checkbox"/> | <input type="checkbox"/> |
| 5. | Being laid off or furloughed?                                        | <input type="checkbox"/> | <input type="checkbox"/> |
| 6. | Required to work in a job that is putting you at risk for infection? | <input type="checkbox"/> | <input type="checkbox"/> |
| 7. | Loss of health insurance?                                            | <input type="checkbox"/> | <input type="checkbox"/> |
| 8. | Shortages of food?                                                   | <input type="checkbox"/> | <input type="checkbox"/> |
| 9. | Loneliness due to remaining at home?                                 | <input type="checkbox"/> | <input type="checkbox"/> |

**10. Since the COVID-19 outbreak, have you required medical care?**

- Yes
- No

(If ‘No’, skip to question 11)

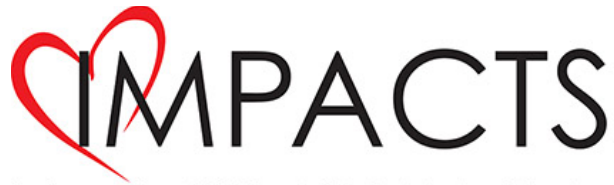

Implementation of Multifaceted Patient-Centered Treatment  
Strategies for Intensive Blood Pressure Control

**10a. Were you able to get the care you needed?**

- Yes
- No

(If 'Yes', skip to question 11)

**10b. Why not?**

|                                                                            | Yes                      | No                       |
|----------------------------------------------------------------------------|--------------------------|--------------------------|
| <b>Clinic, physician, or hospital closed?</b>                              | <input type="checkbox"/> | <input type="checkbox"/> |
| <b>Fear of contracting coronavirus at healthcare facility or pharmacy?</b> | <input type="checkbox"/> | <input type="checkbox"/> |
| <b>Care not available for your medical issue?</b>                          | <input type="checkbox"/> | <input type="checkbox"/> |
| <b>Pharmacy closed?</b>                                                    | <input type="checkbox"/> | <input type="checkbox"/> |
| <b>Afraid to use public transportation due to risk for infection?</b>      | <input type="checkbox"/> | <input type="checkbox"/> |
| <b>Money or cost</b>                                                       | <input type="checkbox"/> | <input type="checkbox"/> |
| <b>Medicaid, Medicare, or Insurance problems?</b>                          | <input type="checkbox"/> | <input type="checkbox"/> |

**11. Since the COVID-19 outbreak, are you able to get your prescription medications?**

- Yes
- No

(If 'Yes', skip to question 12)



Implementation of Multifaceted Patient-Centered Treatment  
Strategies for Intensive Blood Pressure Control

**11a. Why not?**

|                                                                            | Yes                      | No                       |
|----------------------------------------------------------------------------|--------------------------|--------------------------|
| <b>Clinic, physician, or hospital closed?</b>                              | <input type="checkbox"/> | <input type="checkbox"/> |
| <b>Fear of contracting coronavirus at healthcare facility or pharmacy?</b> | <input type="checkbox"/> | <input type="checkbox"/> |
| <b>Care not available for your medical issue?</b>                          | <input type="checkbox"/> | <input type="checkbox"/> |
| <b>Pharmacy closed?</b>                                                    | <input type="checkbox"/> | <input type="checkbox"/> |
| <b>Afraid to use public transportation due to risk for infection?</b>      | <input type="checkbox"/> | <input type="checkbox"/> |
| <b>Money or cost</b>                                                       | <input type="checkbox"/> | <input type="checkbox"/> |
| <b>Medicaid, Medicare, or Insurance problems?</b>                          | <input type="checkbox"/> | <input type="checkbox"/> |

**12. “On a scale of 1 to 10, how serious of a public health threat do you think the coronavirus is or might become? (1 being no threat at all, 10 being a very serious public health threat)”**

\_\_\_\_\_ (number 1-10)

**13. How likely do you think you or someone in your family will get sick from the coronavirus during this outbreak?**

- Very likely
- Somewhat likely
- Not that likely
- Not at all likely
- I or someone in my family has already had the coronavirus

**14. How much has the coronavirus changed your daily routine?**

- A lot
- Some
- A little
- Not at all



Implementation of Multifaceted Patient-Centered Treatment  
Strategies for Intensive Blood Pressure Control

**“As stay-at-home orders are lifted and places start to re-open, how worried are you about getting coronavirus in the following places:”**

|            |                                                                   | <b>Very Worried</b>      | <b>Somewhat Worried</b>  | <b>A Little Worried</b>  | <b>Not at All Worried</b> | <b>Not Applicable</b>    |
|------------|-------------------------------------------------------------------|--------------------------|--------------------------|--------------------------|---------------------------|--------------------------|
| <b>15.</b> | <b>Your workplace?</b>                                            | <input type="checkbox"/> | <input type="checkbox"/> | <input type="checkbox"/> | <input type="checkbox"/>  | <input type="checkbox"/> |
| <b>16.</b> | <b>Stores, such as grocery stores?</b>                            | <input type="checkbox"/> | <input type="checkbox"/> | <input type="checkbox"/> | <input type="checkbox"/>  | <input type="checkbox"/> |
| <b>17.</b> | <b>Restaurants and bars?</b>                                      | <input type="checkbox"/> | <input type="checkbox"/> | <input type="checkbox"/> | <input type="checkbox"/>  | <input type="checkbox"/> |
| <b>18.</b> | <b>Your church?</b>                                               | <input type="checkbox"/> | <input type="checkbox"/> | <input type="checkbox"/> | <input type="checkbox"/>  | <input type="checkbox"/> |
| <b>19.</b> | <b>Your healthcare clinic?</b>                                    | <input type="checkbox"/> | <input type="checkbox"/> | <input type="checkbox"/> | <input type="checkbox"/>  | <input type="checkbox"/> |
| <b>20.</b> | <b>Large gatherings of people such as concerts and festivals?</b> | <input type="checkbox"/> | <input type="checkbox"/> | <input type="checkbox"/> | <input type="checkbox"/>  | <input type="checkbox"/> |

**21. How willing are you to begin returning to your primary care clinic for routine treatment for your blood pressure and other chronic conditions once those services are offered?**

- Very willing
- Somewhat willing
- Not that willing
- Not at all willing

(If ‘Very willing’, skip to question 22)



Implementation of Multifaceted Patient-Centered Treatment  
Strategies for Intensive Blood Pressure Control

**21a. What are your concerns about returning to your primary care clinic?**

|                                                                             | Yes                      | No                       |
|-----------------------------------------------------------------------------|--------------------------|--------------------------|
| Being exposed to COVID-19 at the clinic?                                    | <input type="checkbox"/> | <input type="checkbox"/> |
| Being exposed to COVID-19 on public transportation?                         | <input type="checkbox"/> | <input type="checkbox"/> |
| Lack of transportation that was previously available to get to the clinic?  | <input type="checkbox"/> | <input type="checkbox"/> |
| Difficulty making an appointment at the clinic due to limited availability? | <input type="checkbox"/> | <input type="checkbox"/> |

**22. During the recent outbreak, did you have an appointment with a healthcare provider in person for your high blood pressure or other chronic conditions?**

- Yes
- No

**23. During the recent outbreak, did you have an appointment with a healthcare provider either by phone or computer for your high blood pressure or other chronic conditions?**

- Yes
- No

(If 'No', skip to question 24)

**23a. How did you meet with your provider?**

- By Phone
- By Video
- Both phone and video

**23b. Did you get the help you needed for your health on the call?**

- Yes
- No



Implementation of Multifaceted Patient-Centered Treatment  
Strategies for Intensive Blood Pressure Control

**23c. Was the quality of the healthcare you received on the phone or video better, worse, or the same as the quality of care you receive in person-to-person visits with your provider?**

- Better
- Worse
- Same
- Don't know

**“Have you experienced any of the following problems related to phone and video appointments with your provider:”**

|     |                                                                   | Yes                      | No                       | Not Applicable           |
|-----|-------------------------------------------------------------------|--------------------------|--------------------------|--------------------------|
| 24. | Lack of needed equipment to conduct the provider call?            | <input type="checkbox"/> | <input type="checkbox"/> | <input type="checkbox"/> |
| 25. | Lack of reliable internet or phone connection?                    | <input type="checkbox"/> | <input type="checkbox"/> | <input type="checkbox"/> |
| 26. | Difficulty scheduling a provider call?                            | <input type="checkbox"/> | <input type="checkbox"/> | <input type="checkbox"/> |
| 27. | Difficulty setting up software or app used for the provider call? | <input type="checkbox"/> | <input type="checkbox"/> | <input type="checkbox"/> |
| 28. | Phone or computer appointments are not offered by your provider?  | <input type="checkbox"/> | <input type="checkbox"/> | <input type="checkbox"/> |

**29. Where do you get most of your information about COVID-19?**

- Local and/or national government officials
- Local and/or national newspapers, TV, or radio
- Internet and social media
- Church groups
- Family and friends
- Other (specify): \_\_\_\_\_



Implementation of Multifaceted Patient-Centered Treatment  
Strategies for Intensive Blood Pressure Control

**“Have you done the following things to protect yourself during the COVID-19 outbreak?”**

|     |                                                                    | Yes                      | No                       |
|-----|--------------------------------------------------------------------|--------------------------|--------------------------|
| 30. | Stayed at home as much as possible?                                | <input type="checkbox"/> | <input type="checkbox"/> |
| 31. | Stayed at least 6 feet from other people when you leave the house? | <input type="checkbox"/> | <input type="checkbox"/> |

**32. How often do you wear a mask when you leave the house?**

- Always
- Sometimes
- Rarely
- Never

(If ‘Always’, skip to question 33.)

**32a. Why do you not regularly wear a mask when you leave your house?**

|                                                            | Yes                      | No                       |
|------------------------------------------------------------|--------------------------|--------------------------|
| You believe only sick people need to wear them?            | <input type="checkbox"/> | <input type="checkbox"/> |
| You think masks don’t protect you from COVID-19 infection? | <input type="checkbox"/> | <input type="checkbox"/> |
| You haven’t been able to buy them anywhere                 | <input type="checkbox"/> | <input type="checkbox"/> |
| You can’t afford to buy them                               | <input type="checkbox"/> | <input type="checkbox"/> |
| You don’t leave the house                                  | <input type="checkbox"/> | <input type="checkbox"/> |
| You don’t think the government should tell you to wear one | <input type="checkbox"/> | <input type="checkbox"/> |



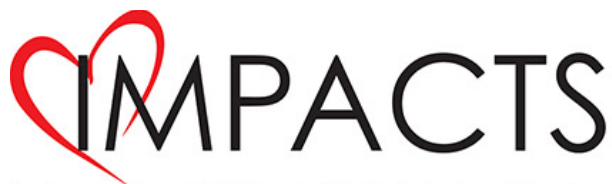

Implementation of Multifaceted Patient-Centered Treatment  
Strategies for Intensive Blood Pressure Control

**33. During the stay-at-home order, how have you been getting your food?**

|                                                                                                      | Yes                      | No                       |
|------------------------------------------------------------------------------------------------------|--------------------------|--------------------------|
| Going to the grocery store during normal hours?                                                      | <input type="checkbox"/> | <input type="checkbox"/> |
| Going to the grocery store during special hours reserved for the elderly or those with disabilities? | <input type="checkbox"/> | <input type="checkbox"/> |
| Having food delivered to your home by a store employee or commercial service, such as Instacart      | <input type="checkbox"/> | <input type="checkbox"/> |
| Having food delivered to your home by a friend or family member                                      | <input type="checkbox"/> | <input type="checkbox"/> |
| Getting food from a food bank                                                                        | <input type="checkbox"/> | <input type="checkbox"/> |
| Using supplies you had in your home before the stay-at-home order began                              | <input type="checkbox"/> | <input type="checkbox"/> |

**34. Which of the following best describes your living situation?**

- Live alone or with family in a single-family home
- Live alone or with family in an apartment or condo with multiple units in the same building
- Live in a residential facility where meals and household help are routinely provided by paid staff (or could be if requested)
- Live in a facility such as a nursing home which provides meals and 24-hour nursing care
- Temporarily staying with a relative or friend
- Temporarily staying in a shelter or homeless
- Other (specify): \_\_\_\_\_

**35. How many people do you live with, including yourself?**

\_\_\_\_\_ number of people



Implementation of Multifaceted Patient-Centered Treatment  
Strategies for Intensive Blood Pressure Control

**36. Do you have to take a shared elevator to get to your home?**

- Yes
- No

**37. Where do you do your laundry?**

- Inside your home
- Shared facility with other households in your building or complex
- Laundromat
- Other (specify): \_\_\_\_\_

**38. Have you taken less of your blood pressure medications or stopped taking them since the COVID 19 outbreak began?**

- Yes
- No

(If 'No', skip to question 39)

**38a. Why have you taken less or quit taking your blood pressure medications?**

|                                                                                                                                | Yes                      | No                       |
|--------------------------------------------------------------------------------------------------------------------------------|--------------------------|--------------------------|
| You are concerned that taking certain blood pressure medications could make COVID 19 symptoms worse in those who are infected? | <input type="checkbox"/> | <input type="checkbox"/> |
| You can't afford your medications?                                                                                             | <input type="checkbox"/> | <input type="checkbox"/> |
| You have not had access to a health care provider to prescribe or refill your medications                                      | <input type="checkbox"/> | <input type="checkbox"/> |
| You have not had transportation to get your medications from the pharmacy                                                      | <input type="checkbox"/> | <input type="checkbox"/> |



Implementation of Multifaceted Patient-Centered Treatment  
Strategies for Intensive Blood Pressure Control

**39. Have you heard that uncontrolled blood pressure makes COVID-19 symptoms worse in those who are infected?**

- Yes
- No

“We thank you for your participation in this blood pressure study.”

Intervention clinics: “Please let me know if you have questions and concerns about your hypertension treatment.”

Control clinics: “If you have any concerns about your blood pressure treatment, please contact your healthcare provider.”

**Figure S1.** Participant Concern about Contracting COVID-19 by Location as Stay-at-Home Orders are Lifted among Black and Non-Black Participants

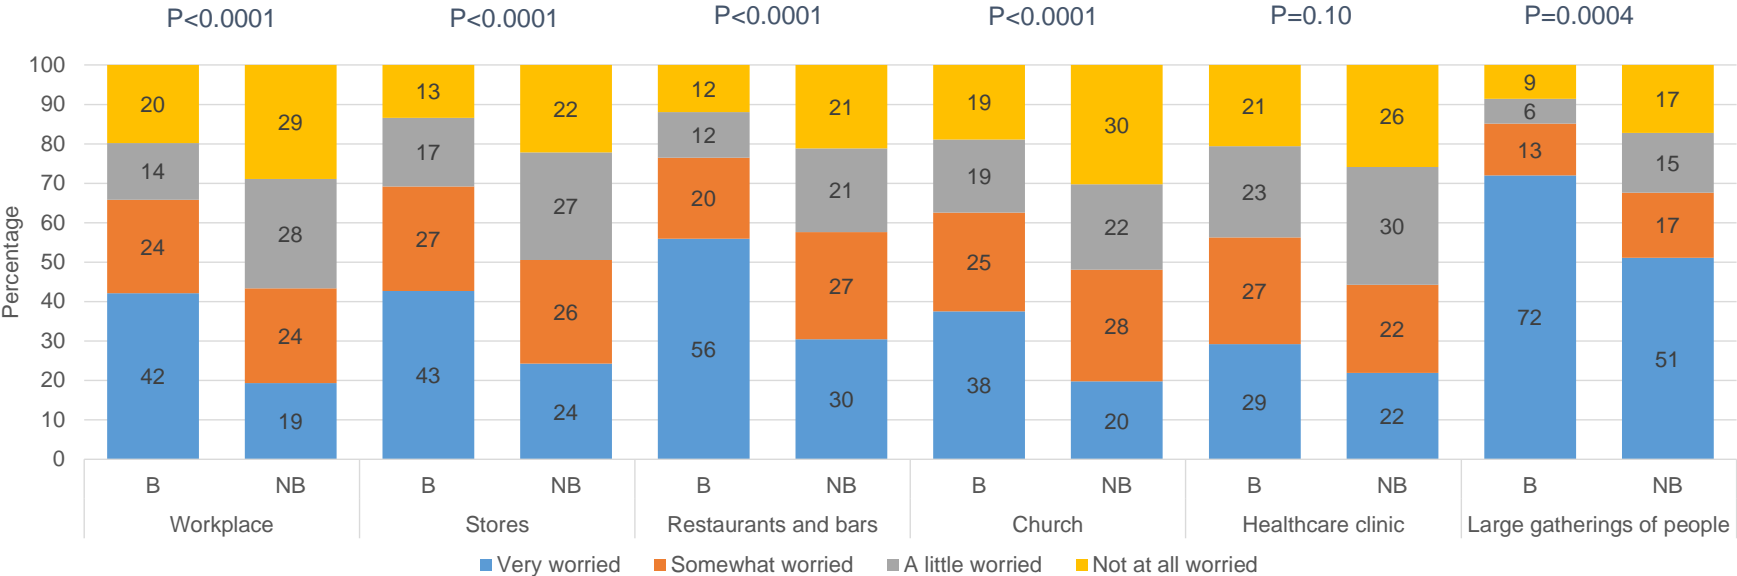

B – Black, NB – Non-Black; P values for differences between racial groups

**Table S1. Comparison of Key Sociodemographic and Clinical Characteristics of 587 Survey Respondents and 262 Nonrespondents**

| Characteristic                     | Survey Respondents<br>N=587 | Survey<br>Nonrespondents<br>N=262 | P for<br>difference |
|------------------------------------|-----------------------------|-----------------------------------|---------------------|
|                                    | N (%) or Mean $\pm$ SD      | N (%) or Mean $\pm$ SD            |                     |
| <b>Sociodemographics</b>           |                             |                                   |                     |
| Age, years                         | 59.4 $\pm$ 9.0              | 58.6 $\pm$ 8.6                    | 0.3                 |
| Female                             | 350 (59.7)                  | 139 (53.3)                        | 0.08                |
| Race                               |                             |                                   |                     |
| Black or African-American          | 381 (65.1)                  | 181 (69.9)                        | 0.1                 |
| White or Caucasian                 | 180 (30.8)                  | 74 (28.6)                         |                     |
| Other                              | 24 (4.1)                    | 4 (1.5)                           |                     |
| Education Level                    |                             |                                   |                     |
| Less than High School              | 134 (22.9)                  | 84 (32.2)                         | 0.01                |
| High School Graduate               | 207 (35.3)                  | 87 (33.3)                         |                     |
| Some Education After High School   | 245 (41.8)                  | 90 (34.5)                         |                     |
| Employment                         |                             |                                   |                     |
| Working Full or Part Time          | 215 (38.3)                  | 97 (40.1)                         | 0.2                 |
| Retired                            | 210 (37.4)                  | 75 (31.0)                         |                     |
| Unemployed                         | 136 (24.2)                  | 70 (28.9)                         |                     |
| Insurance Coverage*                |                             |                                   |                     |
| Medicare                           | 170 (29.0)                  | 75 (28.6)                         | 0.9                 |
| Medicaid                           | 306 (52.1)                  | 134 (51.1)                        | 0.8                 |
| Private/Other                      | 112 (19.1)                  | 43 (16.4)                         | 0.4                 |
| Uninsured                          | 87 (14.8)                   | 45 (17.2)                         | 0.4                 |
| <b>Medical History</b>             |                             |                                   |                     |
| Body Mass Index, kg/m <sup>2</sup> | 33.9 $\pm$ 7.8              | 33.2 $\pm$ 8.1                    | 0.2                 |
| Diabetes                           | 228 (39.5)                  | 98 (37.5)                         | 0.6                 |
| High Cholesterol                   | 369 (64.0)                  | 159 (60.9)                        | 0.4                 |
| Depression                         | 187 (32.5)                  | 76 (29.1)                         | 0.3                 |
| Cardiovascular Disease             | 112 (19.4)                  | 52 (20.0)                         | 0.8                 |
| Chronic Kidney Disease             | 21 (3.6)                    | 4 (1.5)                           | 0.1                 |

FQHC = Federally Qualified Health Center; SD = Standard Deviation

\* Some participants are covered by >1 type of insurance
